# Supplementary material for: The Hymenopteran Tree of Life: Evidence from Protein-Coding Genes and Objectively Aligned Ribosomal Data
Source: PubMed Central journal article supplement (PMC3732274; doi:10.1371/journal.pone.0069344), 2013-08-02
Supplement: pone.0069344.s001.pdf [file pone.0069344.s001.pdf]

**Supplementary Table 1.** Commented table of primers used in this study (Klopfstein et al., The hymenopteran tree of life: evidence from protein-coding genes and objectively aligned ribosomal data).

| Gene                          | Fragment, direction | Primer name             | Sequence                      | Comments                                                                                                                     |
|-------------------------------|---------------------|-------------------------|-------------------------------|------------------------------------------------------------------------------------------------------------------------------|
| <b>CAD<sup>1</sup></b>        | 1, forward          | ap787for2               | TGCTTYGARCCDAGYCTHGATTAYTGCAD | Spanning two introns when combined with 1098rev3                                                                             |
|                               |                     | CADfor2                 | GCYTGYTTYGARCCNAGYCTNGA       | Spanning two introns when combined with 1098rev3                                                                             |
|                               |                     | CADskFor1               | GCGTNGTSAARATNCCRMGRTGGG      | This study; spanning two introns when combined with 1098rev3                                                                 |
|                               |                     | CADfor11                | TGGGATYTNNGYARRTTYCA          |                                                                                                                              |
|                               |                     | CADfor9s                | ATGAARAGYGTNGGNGARGTRATGGC    | Shorter fragment: very good success with taxa that have long introns in CAD (e.g. Ichneumonidae, some Aculeata, etc.)        |
|                               | 1, reverse          | 1098rev3                | ATATTRTTKGGNARYTGDCCKCCC      |                                                                                                                              |
|                               |                     | CADskRev1a              | CRATRACCATNGTRTARCCNCCNGG     | This study; spans only one intron when combined with ap787for2, CADfor2, CADskFor1, or no intron when combined with CADfor9s |
|                               | 2, forward          | apCADfor3               | CTCHGTKGARTTYGATTGGTGYGC      | Combine with either of the two next ones, includes one intron                                                                |
|                               |                     | CADfor4                 | GTKGARTTYGATTGGTGYGCNGT       |                                                                                                                              |
|                               | 2, reverse          | apCADrev3a              | CARGGRTARCCRACYTCYTCRCAAATTC  |                                                                                                                              |
| CADrev4                       |                     | CANGGRTARCCRACYTCNTCGCA |                               |                                                                                                                              |
| <b>RNA pol II<sup>2</sup></b> | forward             | polfor2                 | TGGGAYGSYAAAATGCCCKCAACC      |                                                                                                                              |
|                               |                     | polfor5                 | TGATGAAYNKYTNATGT             |                                                                                                                              |
|                               |                     | polceraf1               | GTAAAYATGATAAGACANCACAG       | After first intron in Ceraphronoidea and Cynipoidea                                                                          |
|                               | reverse             | polrev2                 | TTYACAGCAGTATCRATRAGACCTT     |                                                                                                                              |
|                               |                     | polrev5                 | GCAGTATCRATNAGACCTTCNCG       |                                                                                                                              |

<sup>1</sup> The stretch of CAD amplified here contained three introns. These were present in most taxa, but some appear to be intron-free (e.g. Braconidae). Lengths of introns varied strongly, and long introns often hindered successful amplification of more than one exon.

<sup>2</sup> The RNA pol II portion amplified here was intron-free in most taxa, but introns were found in Ceraphronoidea, Cynipoidea, Scelionidae and some Chalcidoidea.
